# Supplementary material for: Transcriptome Analysis and QTL Mapping Identify Candidate Genes and Regulatory Mechanisms Related to Low-Temperature Germination Ability in Maize
Source: MDPI journal article supplement (doi:10.3390/genes14101917), 2023-10-08
Supplement: s1 [file s1]

**Table S1 Base data of RNA-sequencing**

| Sample | Clean reads pairs | Clean base(bp)  | GC(%)        | Q30(%)      |
|--------|-------------------|-----------------|--------------|-------------|
| Y0d-1  | 23,162,407        | 6,796,656,130   | 51.9; 52.9   | 95.9; 94.6  |
| Y0d-2  | 25,634,775        | 7,402,676,223   | 53.6; 53.4   | 95.5; 94.5  |
| Y0d-3  | 24,033,695        | 7,027,888,250   | 51.2; 52.2   | 95.9; 94.5  |
| Y1d-1  | 34,146,056        | 10,033,225,001  | 51.8; 53.1   | 96.1; 94.9  |
| Y1d-2  | 20,804,649        | 6,097,329,871   | 51.7; 52.9   | 96.0; 94.3  |
| Y1d-3  | 29,270,351        | 8,572,658,563   | 52.3; 53.4   | 96.07; 93.9 |
| Y3d-1  | 40,664,251        | 11,903,399,025  | 52.9; 54.1   | 96.0; 94.43 |
| Y3d-2  | 31,614,601        | 9,230,476,276   | 52.5; 54.0   | 96.2; 90.8  |
| Y3d-3  | 21,672,384        | 6,323,775,929   | 52.8; 54.1   | 96.1; 94.0  |
| Y5d-1  | 22,208,096        | 6,451,057,429   | 53.2; 54.3   | 96.1; 94.2  |
| Y5d-2  | 33,340,444        | 9,781,116,847   | 53.1; 54.2   | 96.1; 93.9  |
| Y5d-3  | 39,317,896        | 11,501,685,020  | 52.4; 53.5   | 96.0; 93.9  |
| Q0d-1  | 28,868,388        | 8,430,927,446   | 52.0; 53.1   | 98.9; 98.4  |
| Q0d-2  | 22,243,431        | 6,484,097,726   | 52.4; 53.6   | 98.8; 98.3  |
| Q0d-3  | 34,396,266        | 10,041,148,107  | 52.3; 53.4   | 98.9; 98.2  |
| Q1d-1  | 36,013,195        | 10,533,646,257  | 52.5; 53.7   | 98.9; 98.3  |
| Q1d-2  | 26,188,695        | 7,675,333,283   | 53.2; 54.4   | 98.9; 98.4  |
| Q1d-3  | 23,056,474        | 6,741,737,931   | 52.9; 54.1   | 98.9; 98.3  |
| Q3d-1  | 32,918,995        | 9,619,442,609   | 53.0; 54.2   | 98.9; 98.1  |
| Q3d-2  | 39,497,155        | 11,564,230,368  | 54.1; 55.4   | 98.9; 98.1  |
| Q3d-3  | 24,658,625        | 7,231,915,748   | 54.1; 55.4   | 98.9; 98.1  |
| Q5d-1  | 23,610,847        | 6,925,408,007   | 53.1; 54.5   | 98.9; 98.1  |
| Q5d-2  | 23,516,580        | 6,882,567,024   | 53.2; 54.4   | 98.9; 98.4  |
| Q5d-3  | 25,895,402        | 7,592,220,745   | 52.5; 53.7   | 98.9; 98.2  |
| Total  | 686,733,658       | 200,844,619,815 | —            | —           |
| Mean   | 28,613,902        | 8,368,525,826   | 52.69; 53.85 | 97.4; 96.1  |

**Table S2 Expression level of candidate genes in two genotypes at low-temperature germination stages**

| GeneID         | T0d   | T1d   | T3d   | T5d   | Y0d   | Y1d   | Y3d   | Y5d   |
|----------------|-------|-------|-------|-------|-------|-------|-------|-------|
| Zm00001d031655 | 3.6   | 4.1   | 6.5   | 9.7   | 3.1   | 3.7   | 7.6   | 14.9  |
| Zm00001d031951 | 1.7   | 3.0   | 3.5   | 5.6   | 0.7   | 3.7   | 6.8   | 16.0  |
| Zm00001d031953 | 0.0   | 0.0   | 0.0   | 0.0   | 0.0   | 1.4   | 1.6   | 7.3   |
| Zm00001d031429 | 435.5 | 552.6 | 446.0 | 396.8 | 490.4 | 774.5 | 790.7 | 571.2 |
| Zm00001d031560 | 140.3 | 160.2 | 129.8 | 130.8 | 121.3 | 241.3 | 224.8 | 169.7 |
| Zm00001d031640 | 245.6 | 338.6 | 272.2 | 230.4 | 226.1 | 477.4 | 425.0 | 259.0 |
| Zm00001d031651 | 63.9  | 62.6  | 64.7  | 56.6  | 86.8  | 133.0 | 147.4 | 106.4 |
| Zm00001d031667 | 8.5   | 9.6   | 9.2   | 13.2  | 3.0   | 5.0   | 4.5   | 6.3   |
| Zm00001d031617 | 47.6  | 48.8  | 50.4  | 60.9  | 18.8  | 22.5  | 35.8  | 40.0  |
| Zm00001d031992 | 5.1   | 5.8   | 6.1   | 7.6   | 1.3   | 2.4   | 3.2   | 3.3   |

**Table S3 The significantly enriched KEGG pathways of the target modules**

| ID       | Description                                         | <i>q</i> -value |
|----------|-----------------------------------------------------|-----------------|
| MEbrown: |                                                     |                 |
| ID       | Description                                         | qvalue          |
| zma00402 | Benzoxazinoid biosynthesis                          | 1.54E-05        |
| zma00940 | Phenylpropanoid biosynthesis                        | 6.46E-03        |
| zma04814 | Motor proteins                                      | 6.46E-03        |
| zma04075 | Plant hormone signal transduction                   | 6.46E-03        |
| zma00280 | Valine, leucine and isoleucine degradation          | 6.46E-03        |
| zma00999 | Biosynthesis of various plant secondary metabolites | 6.46E-03        |
| zma00650 | Butanoate metabolism                                | 6.55E-03        |
| zma00250 | Alanine, aspartate and glutamate metabolism         | 6.73E-03        |
| zma00270 | Cysteine and methionine metabolism                  | 2.32E-02        |
| MERed:   |                                                     |                 |
| zma03010 | Ribosome                                            | 6.31E-132       |
| zma03030 | DNA replication                                     | 1.47E-13        |
| MEgreen: |                                                     |                 |
| zma00190 | Oxidative phosphorylation                           | 3.79E-04        |
| zma01210 | 2-Oxocarboxylic acid metabolism                     | 1.47E-03        |
| zma01240 | Biosynthesis of cofactors                           | 1.47E-03        |
| zma00020 | Citrate cycle (TCA cycle)                           | 1.47E-03        |
| zma00640 | Propanoate metabolism                               | 1.47E-03        |
| zma04145 | Phagosome                                           | 1.47E-03        |
| zma00500 | Starch and sucrose metabolism                       | 1.47E-03        |
| zma00280 | Valine, leucine and isoleucine degradation          | 1.93E-03        |
| zma00860 | Porphyrin metabolism                                | 7.79E-03        |
| zma01200 | Carbon metabolism                                   | 8.48E-03        |
| zma00531 | Glycosaminoglycan degradation                       | 1.45E-02        |
| zma00620 | Pyruvate metabolism                                 | 1.45E-02        |
| zma00270 | Cysteine and methionine metabolism                  | 1.45E-02        |
| zma00071 | Fatty acid degradation                              | 1.45E-02        |
| zma00410 | beta-Alanine metabolism                             | 2.32E-02        |
| zma00052 | Galactose metabolism                                | 2.74E-02        |
